# Supplementary material for: Successive short- and long-range magnetic ordering in rosiaite-type CoGeTeO6 prepared by ion-exchange reaction
Source: Royal Society of Chemistry journal article supplement (doi:10.1039/d3dt01164j), 2023-01-01
Supplement: d3dt01164j1.pdf [file d3dt01164j1.pdf]

## Supplementary Information

for

### Successive Short- and Long-Range Magnetic Ordering in Rosiaite-type $\text{CoGeTeO}_6$ Prepared by Ion-Exchange Reaction

R.V. Bazhan,<sup>a</sup> V.B. Nalbandyan,<sup>a</sup> T.M. Vasilchikova,<sup>b,c</sup> Hyun-Joo Koo,<sup>d</sup> Myung-Hwan Whangbo,<sup>d,e</sup> A.N. Vasiliev<sup>b,c</sup>

<sup>a</sup> Department of Chemistry, Southern Federal University, Rostov-on-Don 344090, Russia

<sup>b</sup> Department of Low Temperature Physics and Superconductivity, M.V. Lomonosov Moscow State University, Moscow 119991, Russia

<sup>c</sup> Functional Quantum Materials Laboratory, National University of Science and Technology "MISIS", Moscow 119049, Russia

<sup>d</sup> Department of Chemistry and Research Institute for Basic Sciences, Kyung Hee University, Seoul 02447, Republic of Korea

<sup>e</sup> Department of Chemistry, North Carolina State University, Raleigh, NC 27695-8204, USA

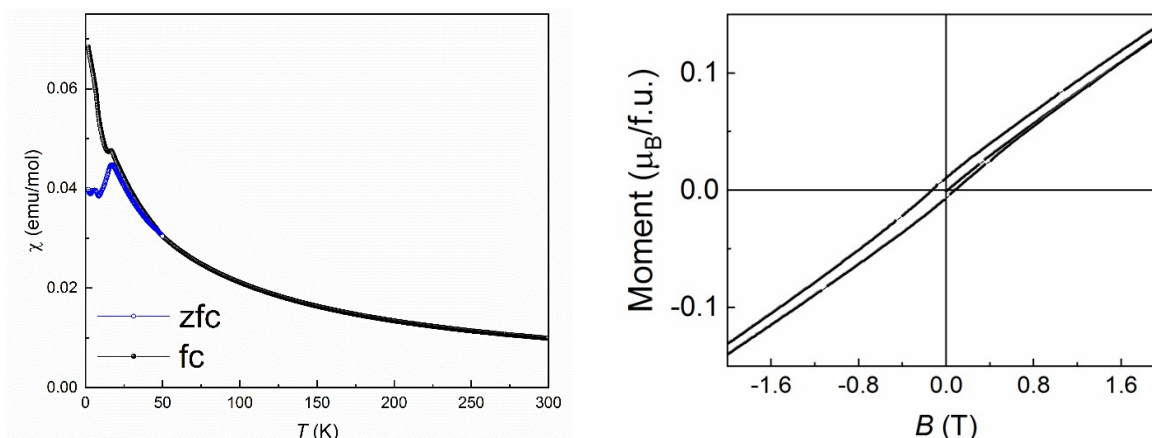

Fig. S1. (left panel) The temperature dependences of the magnetic susceptibility in  $\text{CoGeTeO}_6$  recorded in ZFC (blue open circle) and FC (black sphere) at  $B = 0.1$  T (right panel). Zoom of the magnetization loop in  $\text{CoGeTeO}_6$  at 2 K.

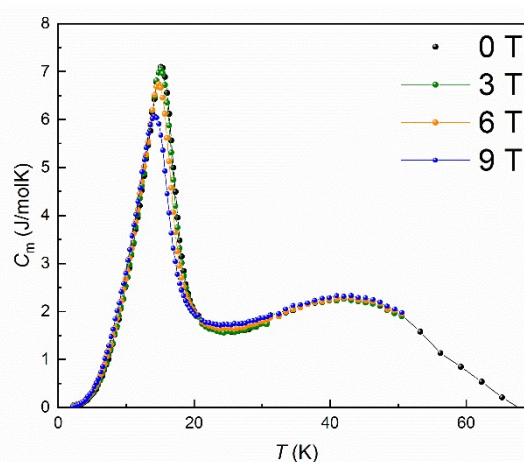

Fig. S2. Magnetic specific heat in  $\text{CoGeTeO}_6$  measured at various magnetic fields.

### Energy mapping analysis

The arrangements of the spin exchange paths  $J_1 - J_3$  are presented in **Fig. S3**. To determine the values of these exchanges by using the energy-mapping analysis [32-34], we employ the four ordered spin states shown in **Fig. S4**. The energies of these states in terms of the spin exchanges  $J_1 - J_3$  using the spin Hamiltonian of **Eq. 2** are summarized in **Table S1**. We then determine the relative energies of these states (**Table S2**) by DFT calculations using the frozen core projector augmented plane wave (PAW) [35, 36] encoded in the Vienna ab Initio Simulation Packages (VASP) [37] and the PBE potential [38] for the exchange-correlation functional. The electron correlation associated with the  $3d$  states of Co was taken into consideration by DFT+ $U$  calculations with an effective on-site repulsion  $U_{eff} = U - J = 3$  and 4 eV [39]. All our DFT+ $U$  calculations used the plane wave cutoff energy of 450 eV, a set of  $(3 \times 3 \times 5)$   $k$ -points, and the threshold of  $10^{-6}$  eV for self-consistent-field energy convergence. Finally, the numerical values of  $J_1 - J_3$  (in K) are obtained by mapping the relative energies of the seven ordered spin states onto the corresponding energies determined by DFT+ $U$  calculations (**Table S2**). The results of these energy-mapping analyses are summarized in **Table 2**.

### (a) Figures

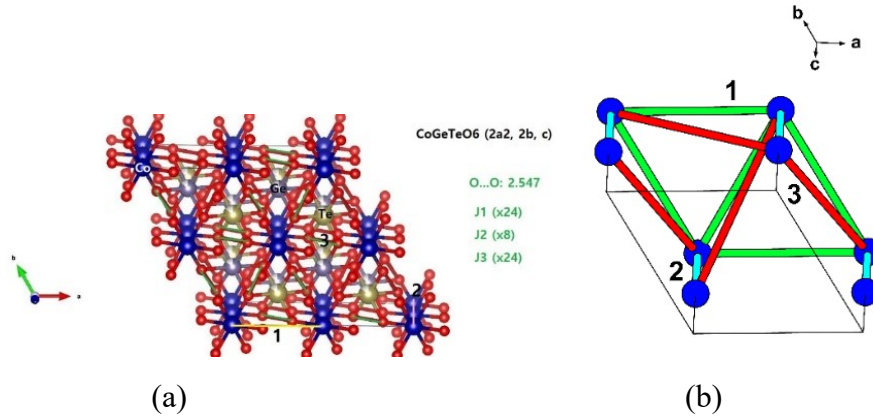

Fig. S3. (a) Perspective view of the CoGeTeO<sub>6</sub> structure and (b) spin exchange paths,  $J_1$  to  $J_3$ . The numbers 1, 2, and 3 indicate the  $J_1$ ,  $J_2$  and  $J_3$  paths, respectively.

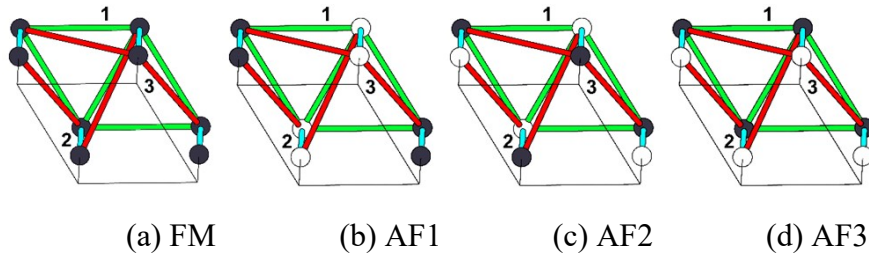

Fig. S4. Ordered spin arrangements where the white circles represent the down spin sites of Co<sup>2+</sup> ions.

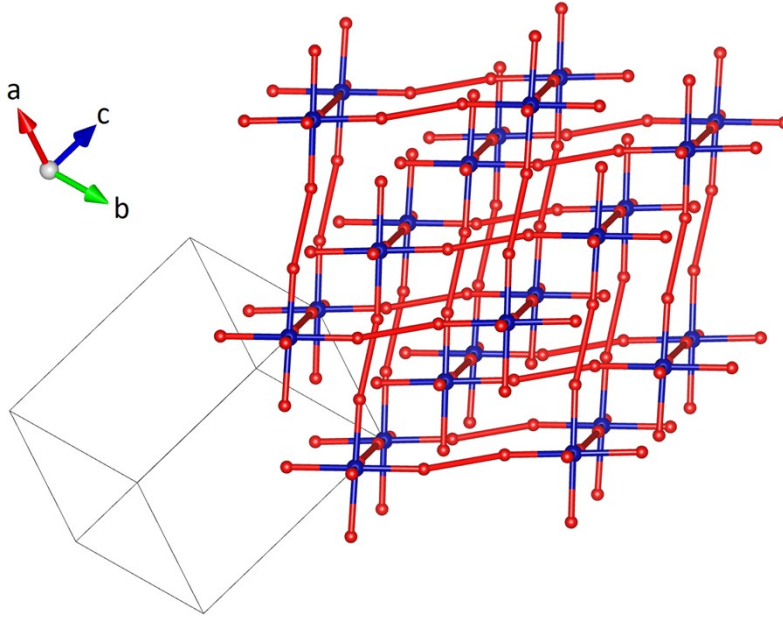

Fig. S5. Three interpenetrating rhombic boxes made up of eight  $\text{CoO}_6$  octahedra joined by the spin exchange paths  $J_3$ .

**(b) Tables**

$$E_{spin} = - \sum_{i=1}^3 n_i J_i S^2, \text{ for the ordered spin}$$

Table S1. Values of  $n_i$  in the energy expressions, states FM and  $\text{AF}_i$  ( $i = 1 - 3$ ) of  $\text{CoGeTeO}_6$

|                  | $J_1$ | $J_2$ | $J_3$ |
|------------------|-------|-------|-------|
| $E_{\text{FM}}$  | -24   | -8    | -24   |
| $E_{\text{AF1}}$ | 8     | -8    | 8     |
| $E_{\text{AF2}}$ | 8     | 8     | -8    |
| $E_{\text{AF3}}$ | -24   | 8     | 24    |

Table S2. Relative energies (in meV/FU) of the FM and  $\text{AF}_i$  ( $i = 1 - 3$ ) of  $\text{CoGeTeO}_6$  obtained from DFT+ $U$  calculations

|     | $U = 3 \text{ eV}$ | $U = 4 \text{ eV}$ |
|-----|--------------------|--------------------|
| FM  | 11.54              | 8.78               |
| AF1 | 3.66               | 2.76               |
| AF2 | 6.78               | 5.09               |
| AF3 | 0                  | 0                  |

**(c) Energy mapping**

$$J_3 = (1/64)(4/N^2)[(E_{\text{AF3}} - E_{\text{FM}}) - (E_{\text{AF2}} - E_{\text{AF1}})]$$

$$J_2 = (1/16)[(4/N^2)(E_{AF2} - E_{AF1}) + 16J_3]$$

$$J_1 = (1/32)[(4/N^2)(E_{AF2} - E_{AF3}) + 32J_3]$$
